# Supplementary material for: The Timing of Pigmentation Lightening in Europeans
Source: Oxford University Press journal article supplement (doi:10.1093/molbev/mss207), 2012-08-25
Supplement: mss207_Supplementary_Data.zip [file mss207_Supplementary_Data.zip]

## SUPPLEMENTARY INFORMATION

### The timing of pigmentation lightening in Europeans

Sandra Beleza, António Múrias dos Santos, Brian McEvoy, Isabel Alves, Cláudia Martinho, Emily Cameron, Mark D. Shriver, Esteban J. Parra, Jorge Rocha

#### CONTENTS

|                                                                                                                                                                                                             |            |
|-------------------------------------------------------------------------------------------------------------------------------------------------------------------------------------------------------------|------------|
| Supplementary Protocol                                                                                                                                                                                      | Page 2-4   |
| Supplementary Text                                                                                                                                                                                          | Page 5-6   |
| Supplementary Tables 1-3                                                                                                                                                                                    | Page 7-9   |
| 1. Features of tag-SNPs and microsatellite markers used to study haplotype variation at the four pigmentation loci.                                                                                         | Page 7     |
| 2. Sweep age and selection coefficients assuming that the European population sizes are recovering exponentially after a bottleneck.                                                                        | Page 8     |
| 3. Age and selection coefficient estimates for other <i>KITLG</i> candidate SNPs.                                                                                                                           | Page 9     |
| Supplementary Figures 1-3                                                                                                                                                                                   | Page 10-12 |
| 1. Results from accuracy tests showing the fraction of known values falling in different HDR intervals.                                                                                                     | Page 11    |
| 2. Microsatellite allele frequency distributions in the pooled sample of European, East Asian and African populations within ancestral and derived lineages defined by tag SNPs at four pigmentation genes. | Page 12    |
| 3. Median-joining network showing the relationships between SNP/microsatellite-haplotypes associated with the SNP rs642742 at the <i>KITLG</i> locus.                                                       | Page 13    |
| References                                                                                                                                                                                                  | Page 14    |

### Supplementary Protocol: Tag-SNPs and microsatellite marker genotyping

rs642742A>G and rs2733831A>G were typed by PCR-Restriction Fragment Length Polymorphism (RFLP). The rs642752A>G polymorphism was amplified within a 231 bp fragment with primers 5'-CTGGTTCTTATCTGAAGGACT-3' (forward) and 5'-AAATCCATTCTGTGATAATAACATG-3' (reverse). The underlined base of the reverse primer is a mismatched base, intentionally inserted to create a *Bse*GI restriction site. PCR reactions contained 0.5-5 ng of genomic DNA, 0.3 µM of each primer, 0.2 mM of each deoxynucleotide triphosphate (dNTP), 10 mM Tris-HCl (pH 8.8), 50 mM KCl, 0.08% Nonidet, 1.5 mM MgCl<sub>2</sub> and 1 U Taq polymerase. Samples were denatured for 3 min at 95°C, followed by 20 cycles of 94°C for 30 s, 56°C for 30 s, and 72°C for 30 s, by 15 cycles of 94°C for 30 s, 54°C for 30 s, and 72°C for 30 s, and finally by a 10 min-extension at 72°C. Digestions (1 U/µl) were performed at 55°C for 1 h and DNA fragments were visualized by silver staining after non-denaturing electrophoresis separation in 9% polyacrylamide gels. Digestion with *Bse*GI generated 205- and 26 bp fragments in the presence of the rs642742\*G allele.

The rs2733831A>G polymorphism was amplified within a 124 bp fragment with primers 5'-CTACCTGAATGCACTGATTTGAA-3' (forward) and 5'-GCATTAAGAAGACACAATCTGTAGAT-3' (reverse). The underlined base of the reverse primer is a mismatched base, intentionally inserted to create a *Bsp*143I restriction site. PCR reactions were identical to rs642742A>G, except for the thermocycling conditions. In this case, samples were denatured for 3 min at 95°C, followed by 35 cycles of 94°C for 30 s, 59°C for 30 s, and 72°C for 30 s, and finally by a 10 min-extension at 72°C. Digestions (1 U/µl) were performed at 37°C for 1 h and DNA fragments were visualized by silver staining after non-denaturing electrophoresis separation in 9% polyacrylamide gels. Digestion with *Bsp*143I generated 97- and 27 bp fragments in the presence of the rs2733831\*G allele.

rs1426654G>A and rs16891982C>G were genotyped using allele-specific PCR with universal energy transfer-labelled primers as described in (Myakishev et al. 2001) by the company Prevention Genetics (Marshfield, Wisconsin, USA).

Microsatellites associated with *KITLG*, *TYRP1*, *SLC24A5* and *SLC45A2* were genotyped by PCR amplification of independent multiplex reactions. Multiplexes were put together based on non-overlapping marker size ranges and/or unique fluorescent dyes. All primer sequences were designed using PRIMER3 software ([http://frodo.wi.mit.edu/cgi-bin/primer3/primer3\\_www.cgi](http://frodo.wi.mit.edu/cgi-bin/primer3/primer3_www.cgi)) and are listed in Table SP1 (see below). *KITLG* and *TYRP1* multiplex-PCR amplifications were carried out using the QIAGEN Multiplex PCR kit (Qiagen) at 1x Qiagen multiplex PCR master mix and 0.5–5 ng of genomic DNA in a 5 µl final reaction volume. Final primer concentration in the reaction was 0.2 µM for all primers. Thermocycling conditions of both reactions included a pre-incubation for 15 min at 95°C, followed by 30 cycles of 94°C for 30 s, 60°C for 90 s, and 72°C for 60 s, and a final incubation of 60°C for 30 min.

*SLC24A5* and *SLC45A2* multiplex-PCR amplifications were performed in 96-well plates in 6 µl reactions containing ~45 ng DNA, 0.075 µM of all primers, 0.03 U Platinum Taq, 100 µM each dNTP, and 1.5 mM MgCl<sub>2</sub>. Thermocycling conditions started with a 2-min denaturation at 95 °C, followed by 27 cycles of 95°C for 40 s, 55°C for 75 s, and 72°C for 40 s, and by a final incubation of 6 min at 72°C. These genotypings were carried out at the company Prevention genetics (Marshfield, Wisconsin).

Fragment analysis and weight determination were performed with automated high-throughput scanning fluorescence detectors that had the ability to detect and separate FAM, TET, NED, HEX, and ROX dyes.

Table SP1. Sequence of the primers constructed for multiplex amplification of the microsatellites associated with the pigmentation genes studied.

| Gene                | Marker             | Forward and Reverse Primer (5'-3')                  |
|---------------------|--------------------|-----------------------------------------------------|
| <b><i>TYRP1</i></b> | (AT) <sub>n1</sub> | ACAGAAAAGCAAGCAAAGAAA<br>GGTACGAAAGAAAATAAACTATAGCA |
|                     | (TC) <sub>n</sub>  | AAAGCTGTCATTCTTACCTTGG<br>GGGCATATTTGGTCATGTCA      |
|                     | (AT) <sub>n2</sub> | TGGCAATCTGCTTTTAGACA<br>AGATCAGGGCTGCCTATCTTA       |
|                     | (AT) <sub>n3</sub> | CCTTGCTCCTCAGCTTTCA<br>ATTAGCCAATGGGATGTCCA         |
|                     | (TG) <sub>n</sub>  | CATTAAGGGCTGCTTGCATT<br>TTACCCACAAGCCATGTGAA        |
|                     | (AT) <sub>n</sub>  | TGGGAAAGGAAGACCTACCC                                |

|                       |                     |                            |
|-----------------------|---------------------|----------------------------|
|                       |                     | CCCATTAATTCTTTGGGAGTTG     |
|                       | (AC) <sub>n1</sub>  | AAAGGAGGGCTAAATGTCCAA      |
|                       |                     | TTCCACCTAGTGGGATGAGTG      |
|                       | (CA) <sub>n</sub>   | AAAGTTTAAATGCCTTCCCAA      |
|                       |                     | CAGCAACTACAATAGCATTCTTATCA |
|                       | (AC) <sub>n2</sub>  | GCCACATGCCCAGATAAAAT       |
|                       |                     | CACTGTCCCCAGTTTCCCTA       |
| <b><i>SLC45A2</i></b> | (TG) <sub>n1</sub>  | GAGCCCCATAAATGACACCA       |
|                       |                     | CCCGATGTGCTAGCAATTTT       |
|                       | (TC) <sub>n</sub>   | CGTAGCAATTATTGTCCCCATT     |
|                       |                     | TGCTGAGCTTCTGGAGCATA       |
|                       | (TG) <sub>n2</sub>  | ATTTGTCTGGGGAAAGGAAA       |
|                       |                     | GGAAAGGTGACCCACAGCTA       |
|                       | (AC) <sub>n</sub>   | AACCCCTTGTCTTGTAGAAGGTT    |
|                       |                     | AAGGAACCAATGGGGAAGAT       |
|                       | (TG) <sub>n3</sub>  | GAGAAAGTCGTTCTGATTCTTTTC   |
|                       |                     | GGTGAAGATAGGTGCTCTAACAA    |
| <b><i>KITLG</i></b>   | (AC) <sub>n</sub>   | TGCCTCCTTCATTTATAGCTCT     |
|                       |                     | TGTGCGAATTTGTGTTTCAG       |
|                       | (TG) <sub>n</sub>   | CCTGAGTAGCTGGGACTACAG      |
|                       |                     | AGGGCTTGATTTTCAGGAGTT      |
|                       | (GATA) <sub>n</sub> | GCTGGGGAACACTCATGTAT       |
|                       |                     | AGACTGGAATGTATACCGTTGG     |
|                       | (GT) <sub>n</sub>   | TGCACCCTAATCGTCTACC        |
|                       |                     | CACCACATAATCTCCTGCAC       |

### Supplementary text: Modelling haplotype variation

In the forward simulations, as the frequency of the derived SNP allele at each pigmentation gene rises, the ancestral microsatellite haplotype to which the derived SNP allele was originally associated is broken down by recombination and mutation at the linked microsatellite markers. During this process, it is also possible that the ancestral haplotype is regenerated by mutation or recombination. However, when the a relatively high number of marker microsatellite is used, as in the present work, the probability of regenerating the ancestral haplotype by mutation becomes increasingly small and may be neglected. When this simplification is used, each microsatellite locus may be defined by one of two states, corresponding to the presence or absence of the allele that became originally associated with the derived SNP variant.

For example, suppose there are four haplotypes consisting of one SNP with one derived (D) and one ancestral allele (A), and five microsatellite loci, each with several tetranucleotide repeat alleles of different size:

H1: 100-200-300-D-400-500

H2: 100-204-300-D-400-500

H3: 100-200-312-A-416-508

H4: 116-212-320-A-424-528

with H1 representing the haplotype where the derived SNP allele originally arose. While a 204→200 one-step mutation in the second (from the left) microsatellite locus of haplotype H2 may regenerate the ancestral haplotype, we note that the waiting time for this mutation is substantially larger than the time necessary for mutation to hit other microsatellites at the H2 haplotype, or for H2 to be modified by recombination. In this setting, the allelic states at the microsatellite loci may be re-coded as:

H1: 1-1-1-D-1-1

H2: 1-0-1-D-1-1

H3: 1-1-0-A-0-0

H4: 0-0-0-A-0-0

where 1 represents the allele that became originally associated with the derived SNP variant at each microsatellite locus, and 0 pools all microsatellite alleles that were not originally present in the ancestral haplotype. Using this approximation (not taking into account the mutational regeneration of the ancestral alleles  $0 \rightarrow 1$ ), the relevant mutation events are  $1 \rightarrow 0$ . Mutations involving non-ancestral-associated microsatellite alleles ( $0 \rightarrow 0$ ) do not change the allelic state and do not need to be taken into account to assess the proportion of derived lineages that preserved the ancestral haplotype ( $P_{anc}$ ). This simplification has the advantage of considerably reducing computation time and avoiding assumptions about unknown details of the microsatellite mutation model.

Note that regeneration through recombination keeps being taken into account. For example, recombination between the third and the second microsatellite loci involving haplotypes H2 and H3 will regenerate haplotype H1

H2: 1-0-1-D-1-1

H3: 1-1-0-A-0-0

Recombinant 1: 1-0-0-A-0-0

Recombinant 2: 1-1-1-D-1-1 (=H1)

**Table S1.** Features of tag-SNPs and microsatellite markers used to study haplotype variation at the four pigmentation loci.

| Gene/Marker name      | Chrom <sup>a</sup> | Physical position (Mb) <sup>b</sup> | Repeat Structure in UCSC                                        | n° of alleles <sup>c</sup> | Mutation rate | Recombination rate <sup>d</sup> |
|-----------------------|--------------------|-------------------------------------|-----------------------------------------------------------------|----------------------------|---------------|---------------------------------|
| <b><i>KITLG</i></b>   |                    |                                     |                                                                 |                            |               |                                 |
| (AC) <sub>n</sub>     | 12                 | 86,912,262                          | (AC) <sub>3</sub> ag(AC) <sub>8</sub> atacatgc(AC) <sub>6</sub> | 3                          | 0.000003      | 0.00149                         |
| (TG) <sub>n</sub>     | 12                 | 87,264,517                          | (TG) <sub>20</sub>                                              | 11                         | 0.00041       | 0.00083                         |
| (GATA) <sub>n</sub>   | 12                 | 87,529,775                          | (GATA) <sub>10</sub>                                            | 6                          | 0.00009       | 0.00070                         |
| (GT) <sub>n</sub>     | 12                 | 87,793,170                          | (GT) <sub>24</sub>                                              | 13                         | 0.00015       | 0.000009                        |
| rs642742              | 12                 | 87,823,877                          | -                                                               | 2                          | 0.0           | -                               |
| <b><i>TYRP1</i></b>   |                    |                                     |                                                                 |                            |               |                                 |
| (AT) <sub>n</sub> 1   | 9                  | 12,510,605                          | (AT) <sub>18</sub>                                              | 19                         | 0.00176       | 0.00006                         |
| (TC) <sub>n</sub>     | 9                  | 12,629,663                          | (TC) <sub>14</sub>                                              | 15                         | 0.00021       | 0.00022                         |
| (AT) <sub>n</sub> 2   | 9                  | 12,673,207                          | (AT) <sub>24</sub>                                              | 23                         | 0.00154       | 0.00063                         |
| rs2733831             | 9                  | 12,693,484                          | -                                                               | 2                          | 0.0           | 0.00038                         |
| (AT) <sub>n</sub> 3   | 9                  | 12,746,781                          | (AT) <sub>27</sub>                                              | 28                         | 0.00015       | -                               |
| <b><i>SLC24A5</i></b> |                    |                                     |                                                                 |                            |               |                                 |
| (TG) <sub>n</sub>     | 15                 | 46,035,800                          | (TG) <sub>24</sub>                                              | 12                         | 0.00039       | 0.000006                        |
| (AT) <sub>n</sub>     | 15                 | 46,197,288                          | (AT) <sub>12</sub>                                              | 10                         | 0.00016       | 0.00205                         |
| rs1426654             | 15                 | 46,213,786                          | -                                                               | 2                          | 0.0           | 0.00001                         |
| (AC) <sub>n</sub> 1   | 15                 | 46,239,976                          | (AC) <sub>16</sub>                                              | 11                         | 0.00011       | 0.00003                         |
| (CA) <sub>n</sub>     | 15                 | 46,258,895                          | (CA) <sub>6</sub> ta(CA) <sub>6</sub> tacacaa(CA) <sub>6</sub>  | 4                          | 0.00002       | 0.00122                         |
| (AC) <sub>n</sub> 2   | 15                 | 46,315,582                          | (AC) <sub>21</sub>                                              | 12                         | 0.00035       | -                               |
| <b><i>SLC45A2</i></b> |                    |                                     |                                                                 |                            |               |                                 |
| (TG) <sub>n</sub> 1   | 5                  | 33,796,742                          | (TG) <sub>21</sub>                                              | 13                         | 0.00030       | 0.00139                         |
| (TC) <sub>n</sub>     | 5                  | 33,871,770                          | (TC) <sub>23</sub> (TG) <sub>8</sub>                            | 25                         | 0.00095       | 0.00068                         |
| (TG) <sub>n</sub> 2   | 5                  | 33,977,160                          | (TG) <sub>10</sub> (CG) <sub>3</sub>                            | 3                          | 0.00003       | 0.00053                         |
| rs16891982            | 5                  | 33,987,450                          | -                                                               | 2                          | 0.0           | 0.00045                         |
| (AC) <sub>n</sub>     | 5                  | 34,003,646                          | (AC) <sub>23</sub>                                              | 14                         | 0.00032       | 0.00045                         |
| (TG) <sub>n</sub> 3   | 5                  | 34,004,928                          | (TC) <sub>10</sub> (TG) <sub>16</sub>                           | 19                         | 0.00139       | -                               |

<sup>a</sup>Chrom=Chromosome

<sup>b</sup>Data from UCSC genome web browser (<http://genome.ucsc.edu>).

<sup>c</sup>Total number of alleles observed in African, Asian and European populations.

<sup>d</sup>Recombination rate between adjacent markers, measured to the right-side of the first marker (see Figure 1).

**Table S2.** Sweep age and selection coefficients assuming that the European population sizes are recovering exponentially after a bottleneck

| SNP, allele and demographic model                                                     | Dominant Model |                          | Additive Model |                          |
|---------------------------------------------------------------------------------------|----------------|--------------------------|----------------|--------------------------|
|                                                                                       | $s^b$          | Age (years) <sup>c</sup> | $s^b$          | Age (years) <sup>c</sup> |
| rs1426654, <i>SLC24A5</i> *A<br>N <sub>e</sub> =1,000; $\gamma$ =0.0020 <sup>a</sup>  | 0.160          | 12,432                   | 0.048          | 8,736                    |
| rs16891982, <i>SLC45A2</i> *G<br>N <sub>e</sub> =1,000; $\gamma$ =0.0020 <sup>a</sup> | 0.049          | 15,036                   | 0.031          | 14,560                   |
| rs2733831, <i>TYRP1</i> *G<br>N <sub>e</sub> =1,000; $\gamma$ =0.0020 <sup>a</sup>    | 0.015          | 15,652                   | 0.021          | 14,028                   |
| rs642742, <i>KITLG</i> *G<br>N <sub>e</sub> =1,000; $\gamma$ =0.0020 <sup>a</sup>     | 0.011          | 27,160                   | 0.011          | 30,884                   |

<sup>a</sup> Growth (recover) phase in Europe after bottleneck. N<sub>e</sub> = effective population size at the end of the bottleneck;  $\gamma$  = population growth rate (see Material and Methods).

<sup>b</sup> Selection coefficient.

<sup>c</sup> Assuming a generation interval of 28 years (Fenner 2005).



**Table S3.** Age and selection coefficient estimates for other *KITLG* candidate SNPs.

| Tag SNP    | Allele                            | Dominant model |                          | Additive model |                          |
|------------|-----------------------------------|----------------|--------------------------|----------------|--------------------------|
|            |                                   | $s^a$          | Age (years) <sup>b</sup> | $s^a$          | Age (years) <sup>b</sup> |
| rs10732643 | <i>KITLG</i> *G-Eur <sup>c</sup>  | 0.01           | 42,308                   | 0.01           | 39,480                   |
| rs10732643 | <i>KITLG</i> *G-EAsi <sup>d</sup> | 0.009          | 29,456                   | 0.01           | 34,720                   |
| rs1881227  | <i>KITLG</i> *T-Eur <sup>c</sup>  | 0.015          | 42,251                   | 0.01           | 39,424                   |
| rs1881227  | <i>KITLG</i> *T-EAsi <sup>d</sup> | 0.009          | 51,156                   | 0.01           | 36,680                   |
| rs3782181  | <i>KITLG</i> *A-Eur <sup>c</sup>  | 0.010          | 28,224                   | 0.01           | 37,856                   |
| rs3782181  | <i>KITLG</i> *A-EAsi <sup>d</sup> | 0.009          | 23,324                   | 0.01           | 33,124                   |

<sup>a</sup> Selection coefficient (see Material and Methods).

<sup>b</sup> Assuming a generation interval of 28 years (Fenner 2005).

<sup>c</sup> *KITLG* \*G lineages sampled in the European population.

<sup>d</sup> *KITLG* \*G lineages sampled in the East Asian population.

### Supplementary Figure Legends

**Figure S1.** Results from accuracy tests showing the fraction of known values (y axis) falling in different HDR intervals (x axis).

**Figure S2.** Microsatellite allele frequency distributions in the pooled sample of European, East Asian and African populations within ancestral (black bars) and derived (yellow bars) lineages defined by tag SNPs at four pigmentation genes. V=variance in repeat number; H=heterozygosity; n= number of chromosomes.

**Figure S3.** Median-joining network showing the relationships between SNP/microsatellite-haplotypes associated with the SNP rs642742 at the *KITLG* locus. Ancestral and derived lineages at rs642742 are separated by a dashed line. The network contains only the haplotypes with frequency  $\geq 2$ .

**Figure S1**

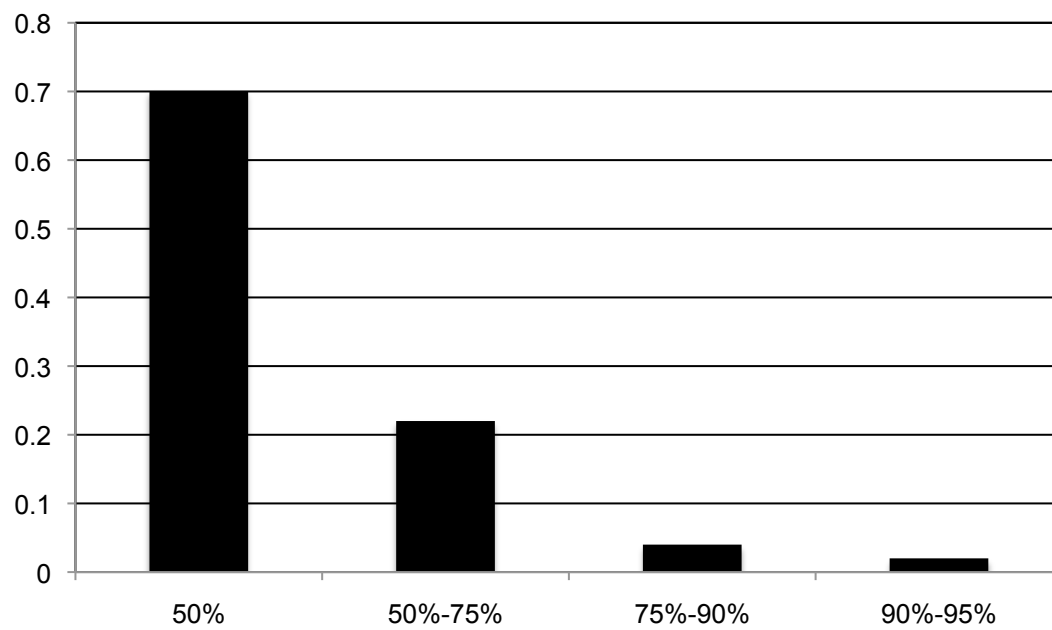

**Figure S2**

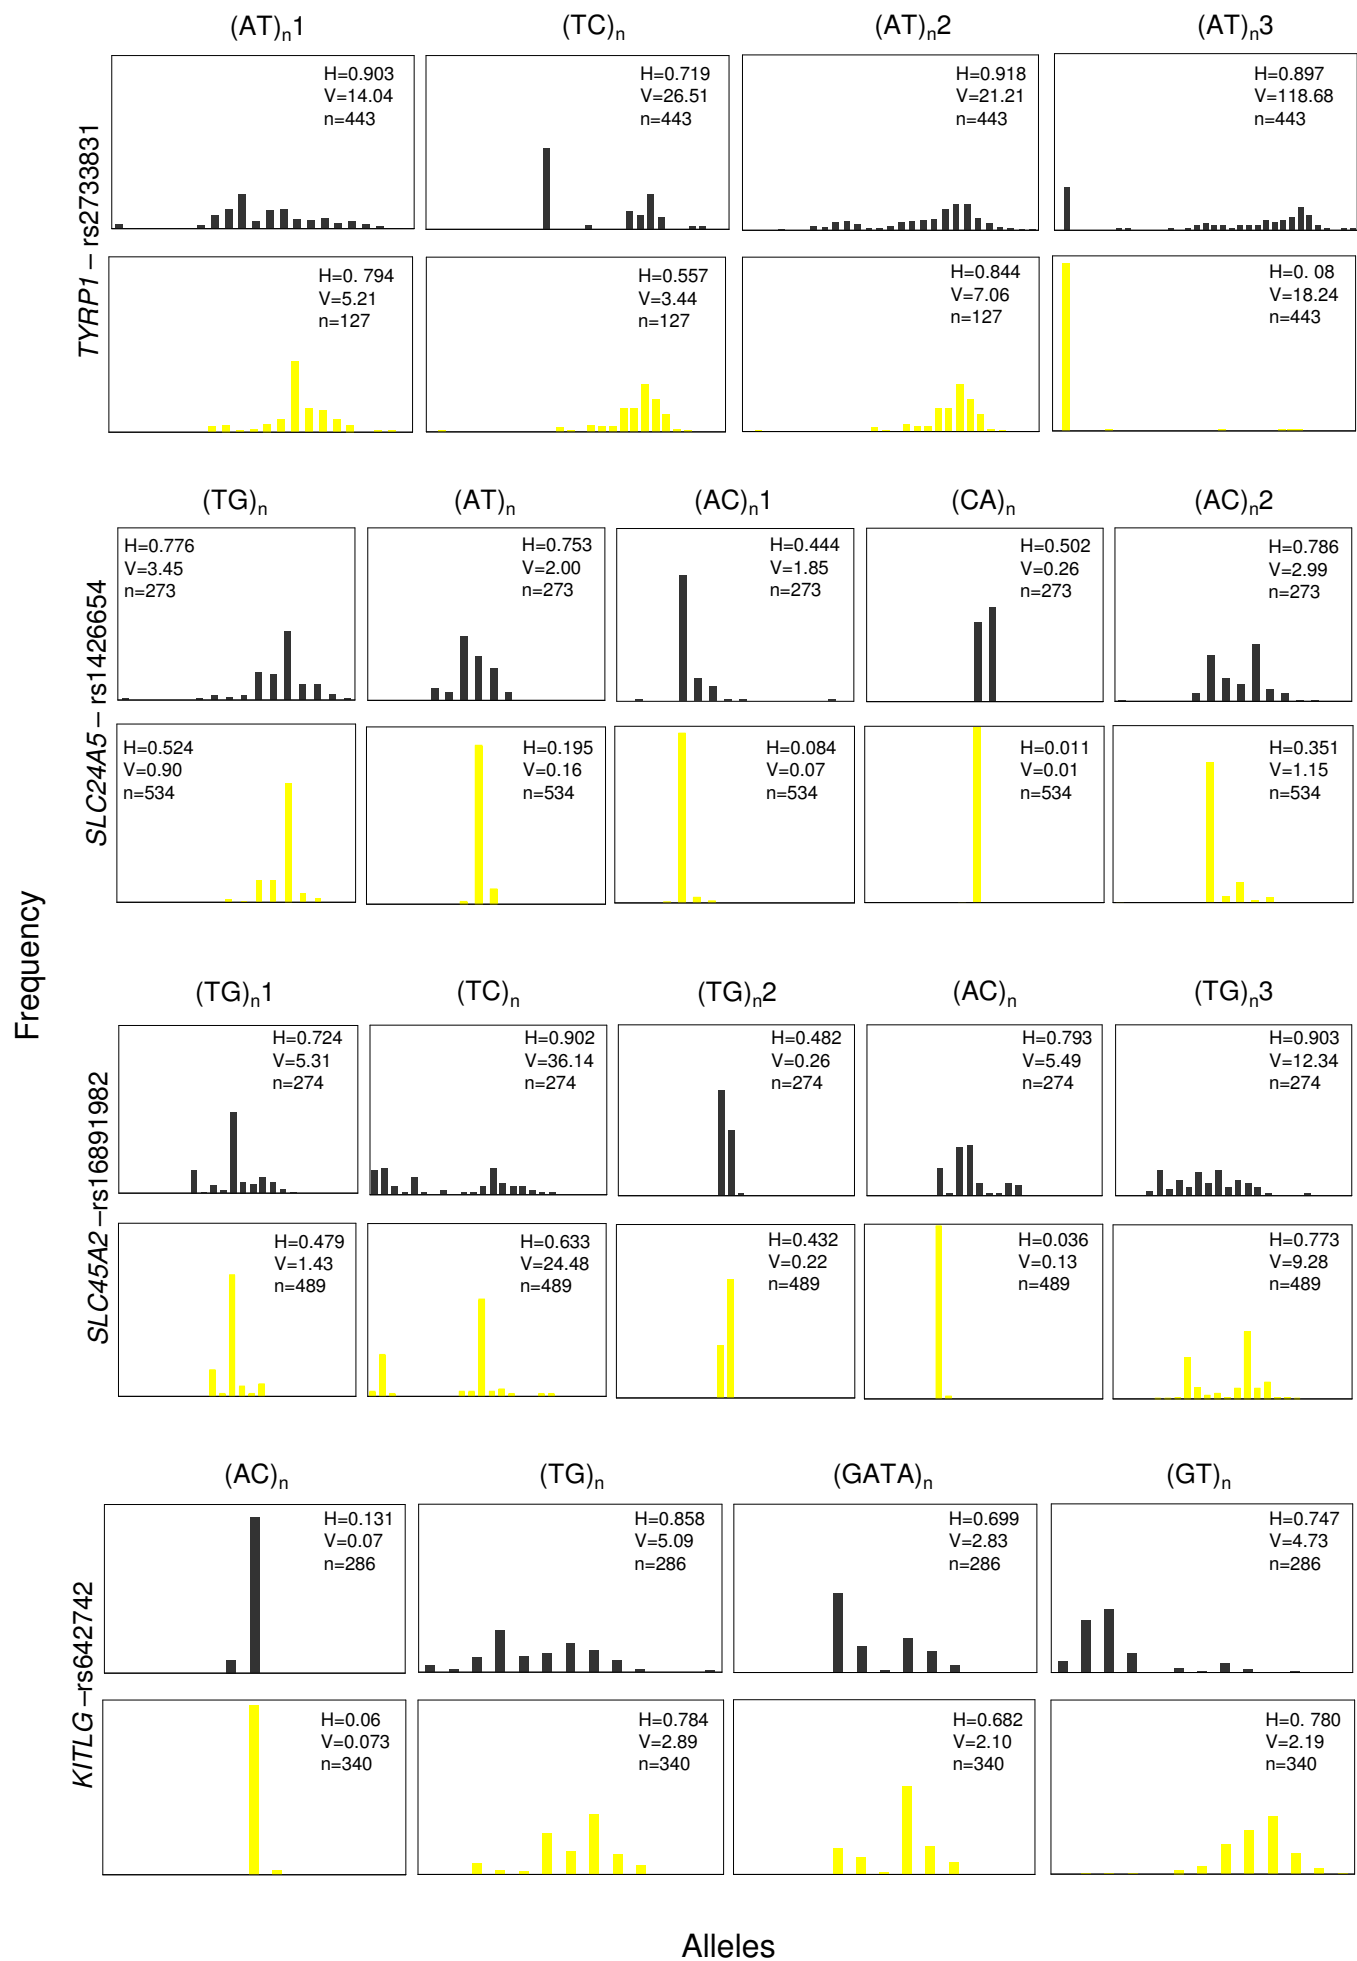

Figure S3

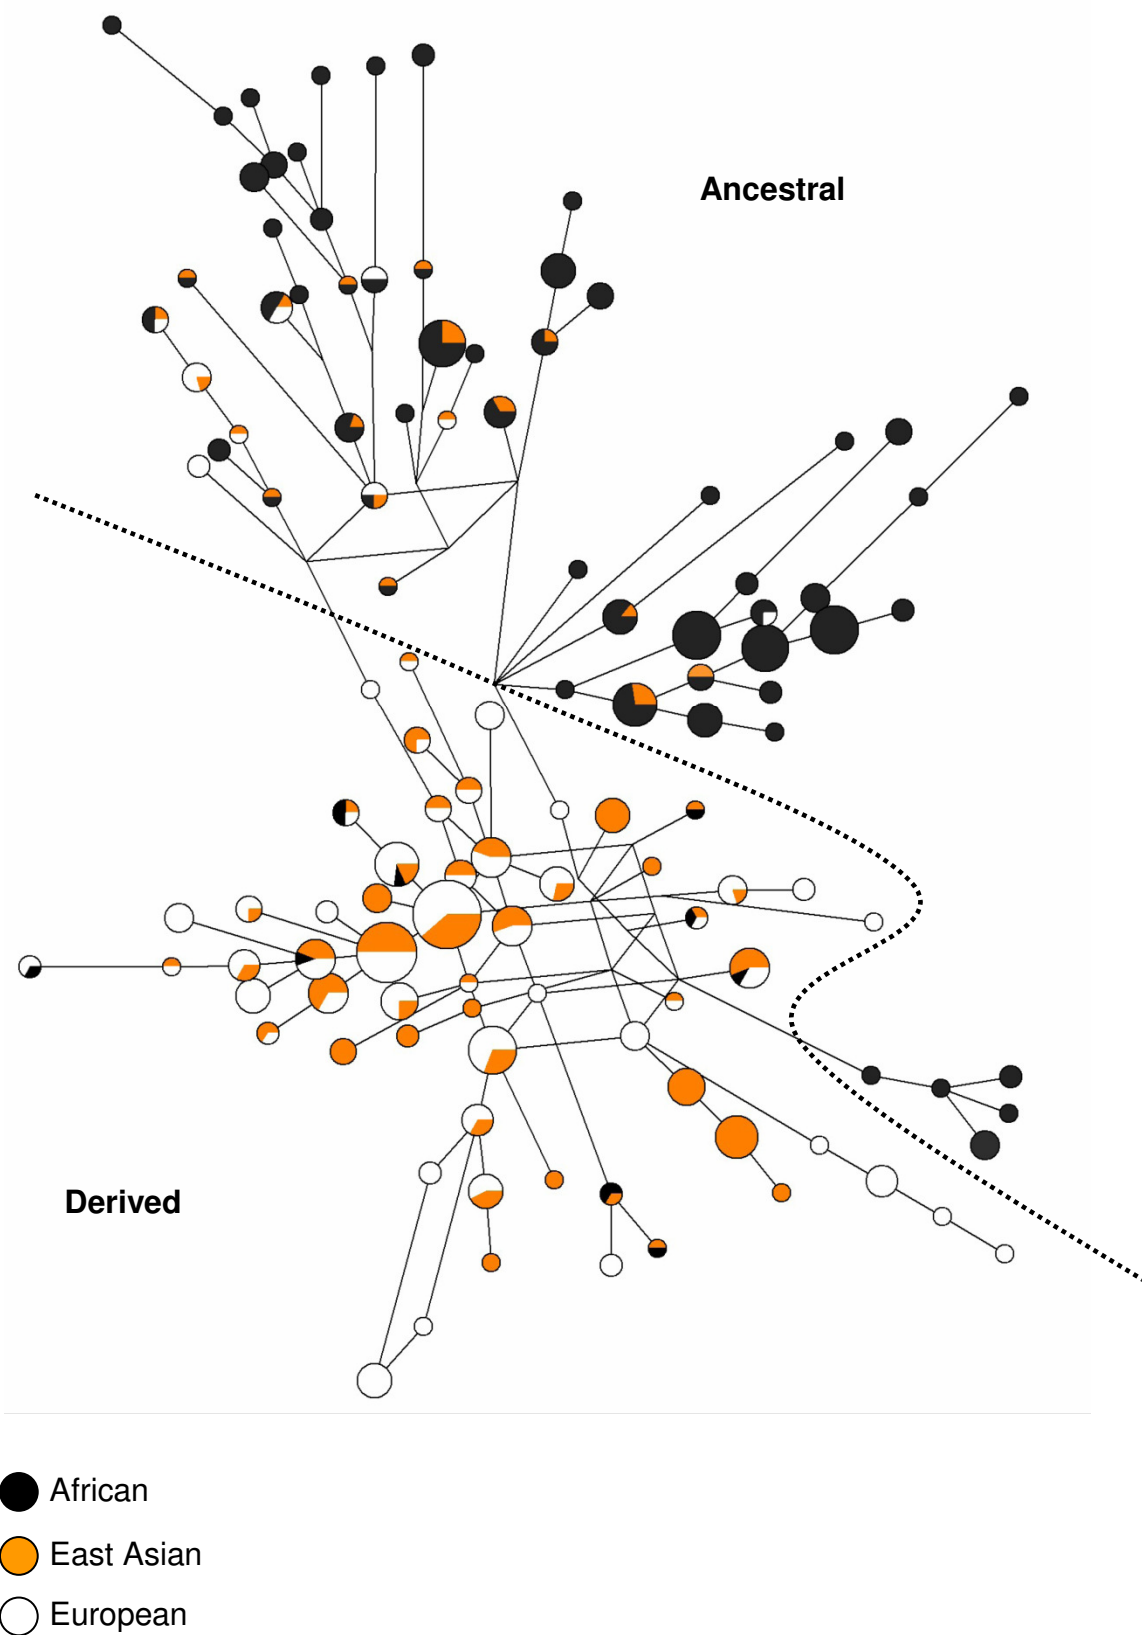

## References

- Fenner JN. 2005. Cross-cultural estimation of the human generation interval for use in genetics-based population divergence studies. *Am J Phys Anthropol* 128:415-423.
- Myakishev MV, Khripin Y, Hu S, Hamer DH. 2001. High-throughput SNP genotyping by allele-specific PCR with universal energy-transfer-labeled primers. *Genome Res* 11:163-169.
